# Supplementary material
Source: publisher figshare collection journal article supplement (https://tandf.figshare.com/ndownloader/files/17436464)
Supplement: Supplementary file 1 [file 17436464]

# Appendix

Critical words used in Experiments 1 and 3: enterprise, centigrade, antidote, mental, plaintiff, hunter, center, lentil, painter, gentle, county, mounting, panty, dainty, plenty, frontal, tentative, quantitative, fantasy, pantomime, cantaloupe, antelope, vantage, dental, mantel, counter, enter, rental, vintage, bounty, shanty, renting, counting, ninety, taunting, tantalize, lamentable, sentiment

Filler words used in Experiment 1 and 3: livelihood, competence, manuscript, almond, modest, fable, famine, couple, pastor, basket, season, proper, roommate, locker, juicy, noisy, surgery, flammable, memorable, passenger, aftermath, molecule, passport, fragile, welfare, concert, follow, temple, rocket, tiger, bunker, worry, sleeping, sixteen, typing, aggregate, futuristic, temptation

Nonwords with /nt/ used in Experiment 1: æntɚpɹum, suntəgɹoɪk, ʌntədæk, mintən, plɔntəs, huntl̩, sintl̩, lɑuntɚ, pontl̩, d͡ʒɝntɚ, kʊnto, mæntəm, pɪntu, daɪnte, plɑunto, fɹæntɚ, toɪntətus, kwintətctən, fɛntəɹu, paɪntəmən, kɑuntəlɑd, ɛntəɹɑup, vɑuntəS, doɪntɚ, mʊntɚ, kaɪntl̩, aɪntl̩, ɹcntɚ, voɪntəz, bʊntu, ʃonte, ɹentəm, kaɪntəm, næntoɪ, tontəm, tontəlɝp, limæntəgɚ, sintəməd

Nonwords without /nt/ used in Experiment 1: fɛskəɹu, kɑukəlɑd, toməlɝp, sifl̩, kʊflo, pofl̩, ɹefəm, doɪfɚ, bʊmu, fɹælɚ, dɑɪfe, plɑuko, mækəm, miskən, huskl̩, kɑɪskl̩, ɛfəɹɑup, toɪlətus, limæskəgɚ, æfɚpɹum, suskəgɹoɪk, siləməd, plɔkəs, lɑulɚ, d͡ʒɝflɚ, pɪsku, vɑuskəʃ, mʊkɚ, ɑɪskl̩, ɹɔflɚ, voɪməz, ʃome, kɑɪskəm, næfloɪ, toləm, pɑɪfləmən, kwiflətɔtən, ʌlədæk

Critical words used in Experiment 2: enterprise, counting, plenty, gentle, hunter, county, antidote, cantaloupe, enter, vintage, counter, plaintiff, ninety, mounting, dental, center, painter, taunting, bounty, tentative, vantage, antelope, frontal, fantasy, mental, mantel

Filler words used in Experiment 2: livelihood, manuscript, almond, modest, fable, famine, pastor, basket, season, proper, juicy, noisy, surgery, memorable, aftermath, molecule, passport, fragile, welfare, concert, follow, rocket, tiger, sleeping, sixteen, typing

Nonwords with /nt/ used in Experiment 2: æntɚprum, ʌntədæk, mintən, plɔntəs, huntl̩, sintl̩, pontl̩, d͡ʒɝntɚ, kʊnto, mæntəm, plɑunto, fræntɚ, toɪntətus, fɛntəru, kɑuntəlɑd, ɛntərɑup, vɑuntəʃ, doɪntɚ, mʊntɚ, kɑɪntl̩, ɑɪntl̩, voɪntəz, bʊntu, kɑɪntəm, næntoɪ, tontəm

Nonwords without /nt/ used inExperiment 2: fɛskəɹu, toməlɝp, sifl̩, kʊflo, pofl̩, ɹefəm, bʊmu, fɹælɚ, dɑɪfe, plɑuko, huskl̩, kɑɪskl̩, ɛfəɹɑup, limæskəgɚ, suskəgɹoɪk, siləməd, plɔkəs, lɑulɚ, d͡ʒɝflɚ, pɪsku, vɑuskəʃ, ɑɪskl̩, ɹɔflɚ, kɑɪskəm, næfloɪ, toləm

Practice words used in Experiments 1-3: vector, present, cancel, salary, purple, buckle

Practice nonwords used in Experiments 1-3: tɹʊflo, koɪfet, flʊʃu, flofl̩, klefəm, ʃɹifl̩
